# Supplementary material for: Silver nanoparticles embedded in cyclodextrin–silicate composite and their applications in Hg(ii) ion and nitrobenzene sensing
Source: Royal Society of Chemistry journal article supplement (doi:10.1039/c3an36488g), 2013-01-01
Supplement: c3an36488g.pdf [file c3an36488g.pdf]

## Supporting Information

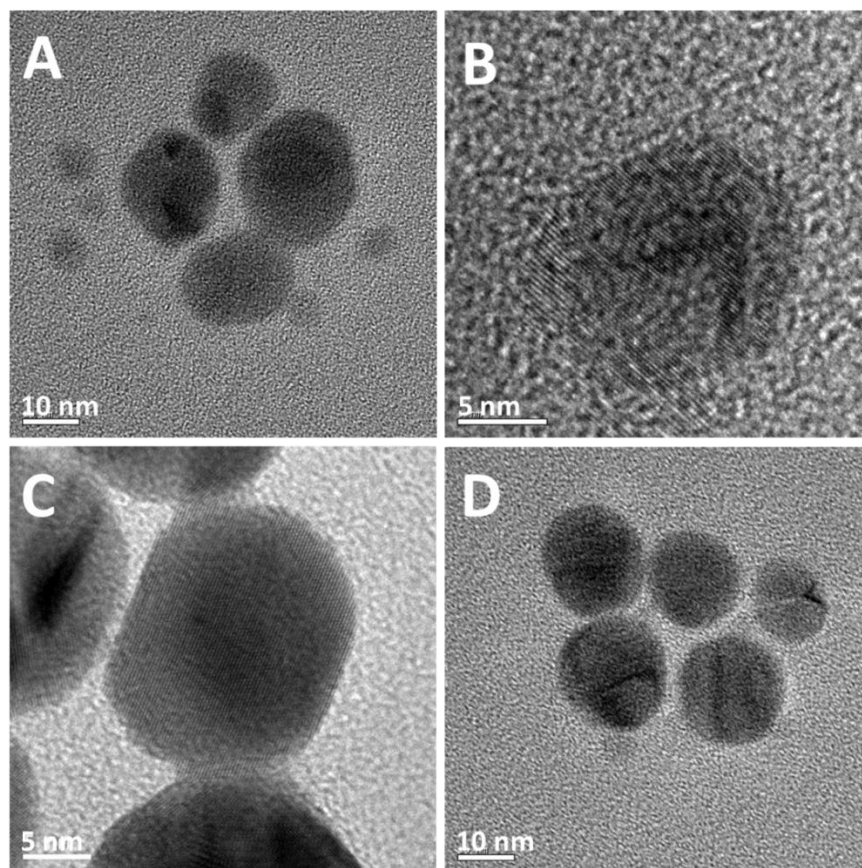

**Figure S1.** HRTEM images of Ag-TPDT NPs (A), CD-Ag-TPDT NPs (B) BDAC-Ag-TPDT NPs (C) and BDAC-CD-Ag-TPDT/AA NPs (D).

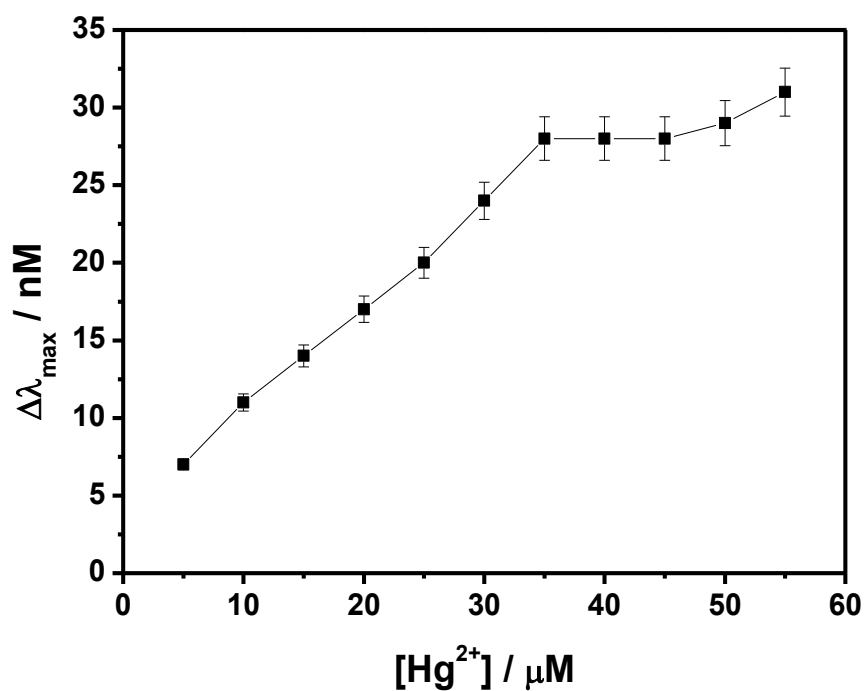

**Figure S2.** Calibration plot obtained from the difference in SPR band maximum ( $\Delta\lambda_{\max}$ ) against concentration of Hg(II) ions for BDAC-CD-Ag-TPDT/AA NPs upon each addition of 5  $\mu\text{M}$  of Hg (II) ions.

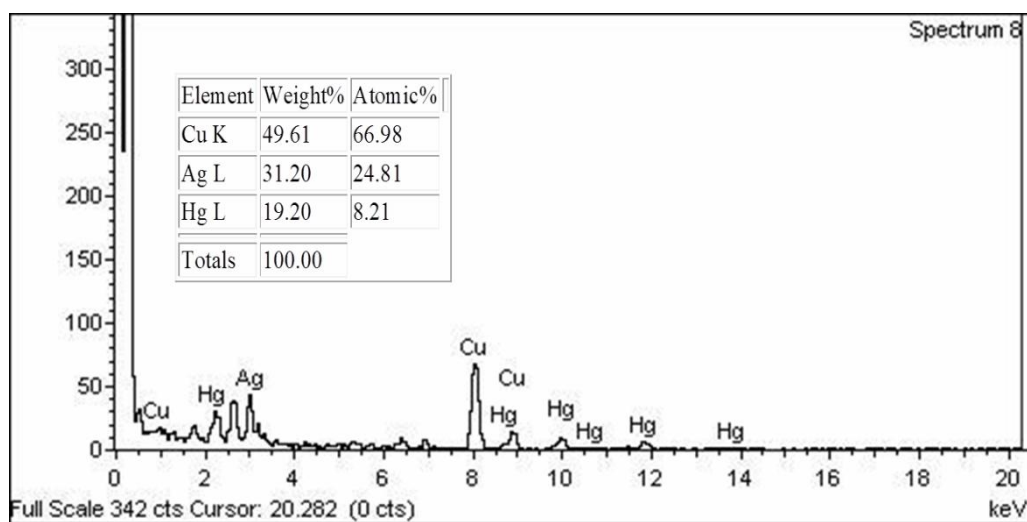

**Figure S3.** EDX spectrum of BDAC-CD-Ag-TPDT/AA NPs after the addition of 55  $\mu\text{M}$  Hg(II) ions.
